# Supplementary material
Source: Springer Nature journal article supplement (https://www.springermedizin.de/resource/supplementary/13014_2006_30_MOESM6_ESM.pdf/9632764)

FEV 1  
[l/sec.]

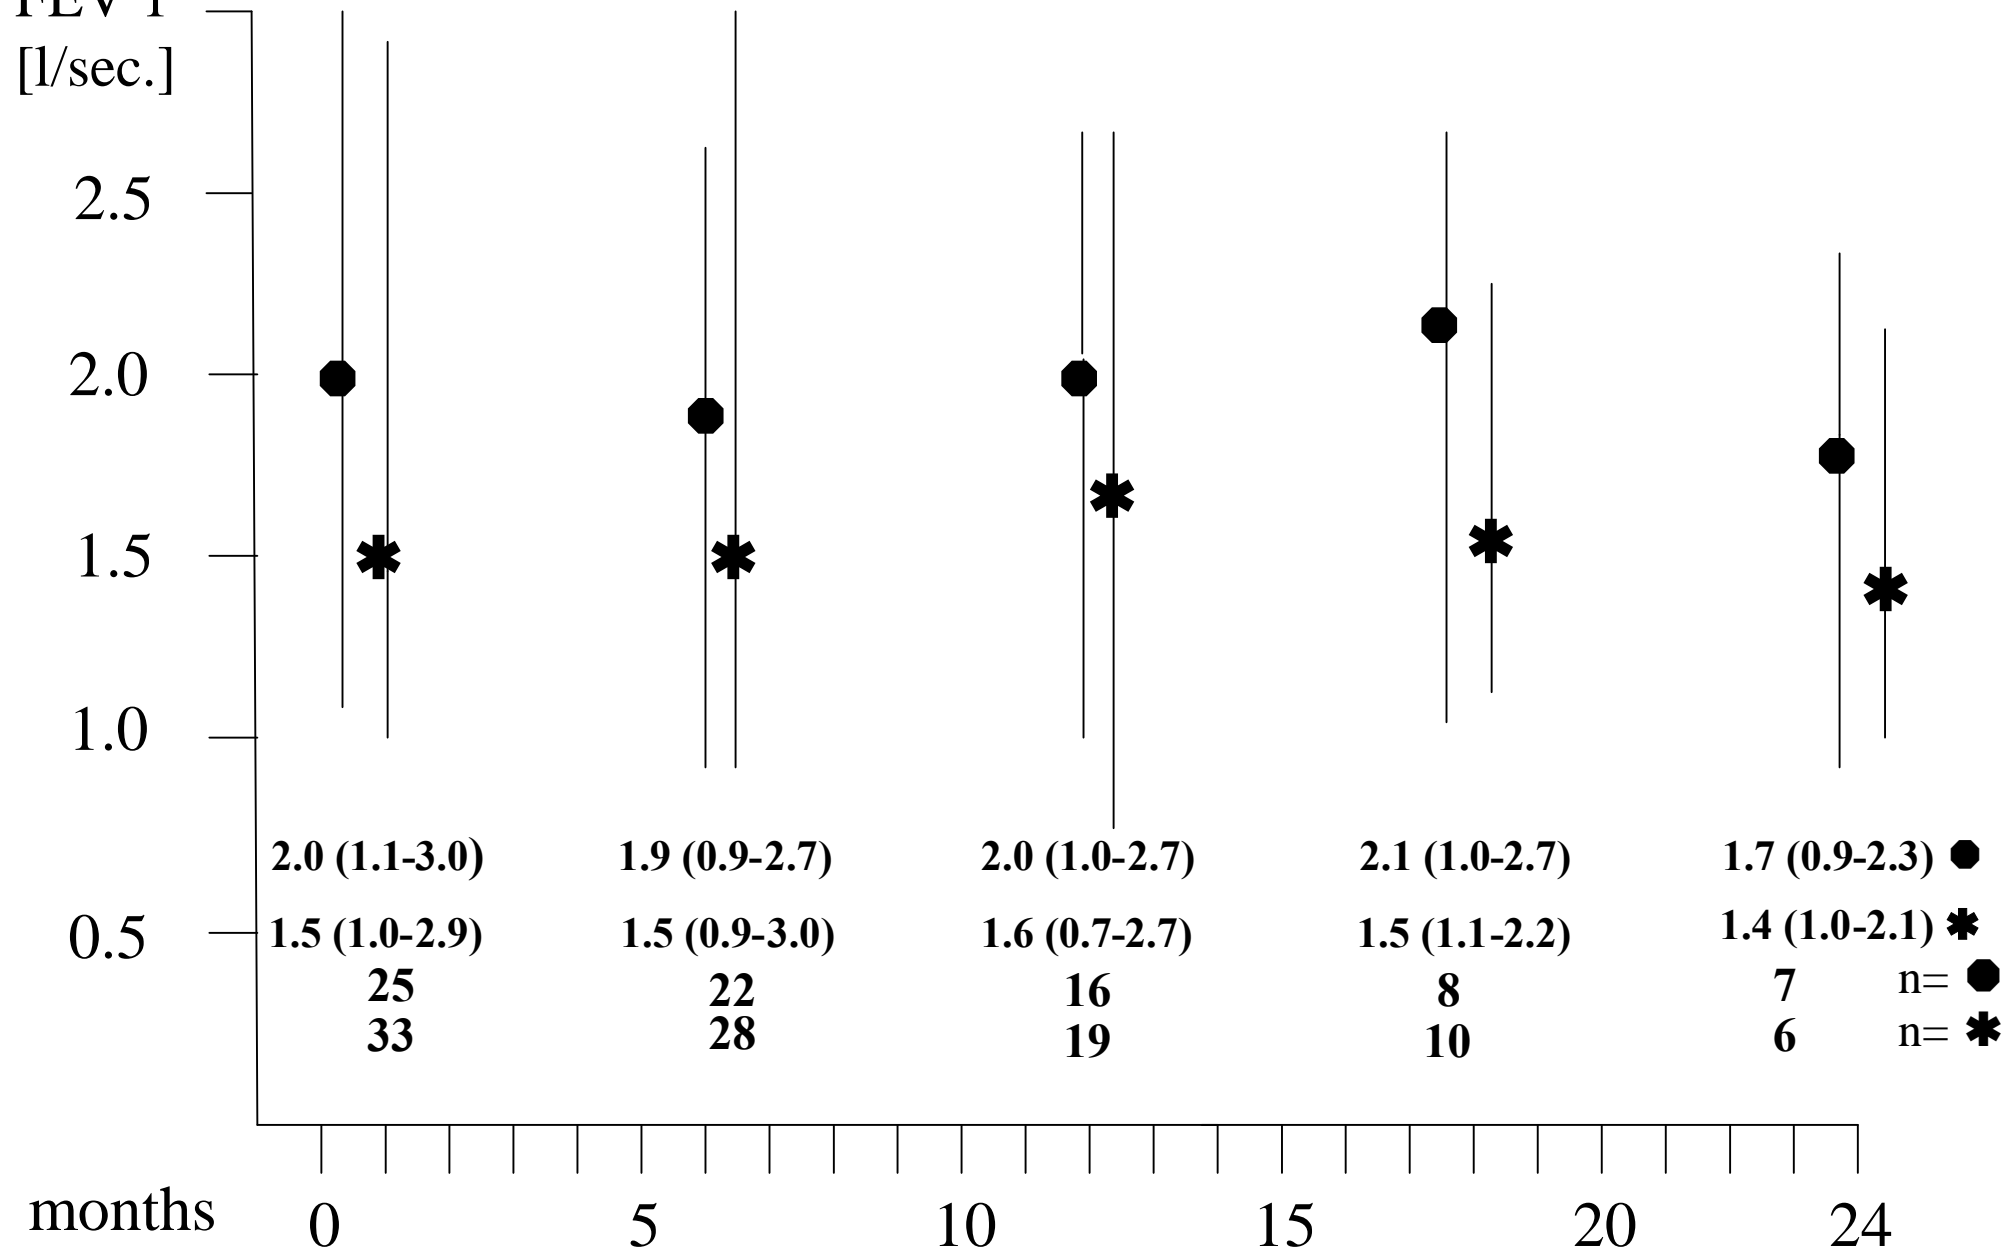

Supplement: MOESM6 [file 9632764]
